# Supplementary material for: Insoluble lipid film mediates the transfer of soluble saccharides from the sea to the atmosphere: the role of hydrogen bonding
Source: Copernicus journal article supplement (doi:10.5194/acp-2022-628), 2022-09-23
Supplement: Supplementary file 1 [file acp-2022-628-supplement.pdf]

1 **Supplement**

2 **Insoluble lipid film mediates the transfer of soluble saccharides from the sea to**  
3 **the atmosphere: the role of hydrogen bonding**

4 Minglan Xu, Narcisse Tsona Tchinda, Jianlong Li, Lin Du\*

5 Environment Research Institute, Shandong University, Binhai Road 72, Qingdao,  
6 266237, China

7 Correspondence: Lin Du ([lindu@sdu.edu.cn](mailto:lindu@sdu.edu.cn))

8

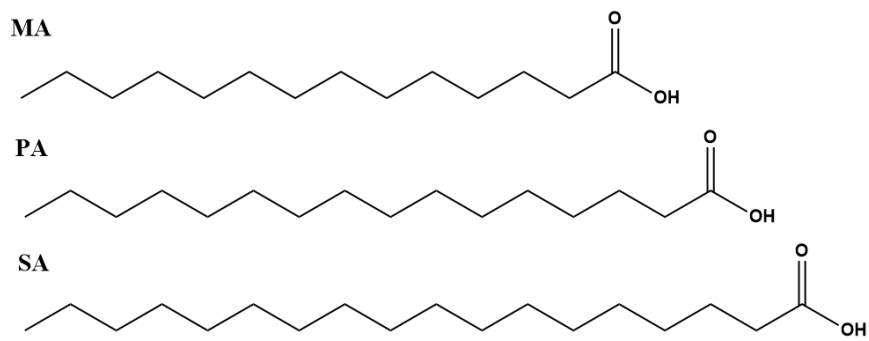

9

10 Figure S1. Chemical structures of the three fatty acids used in this study.

11

12

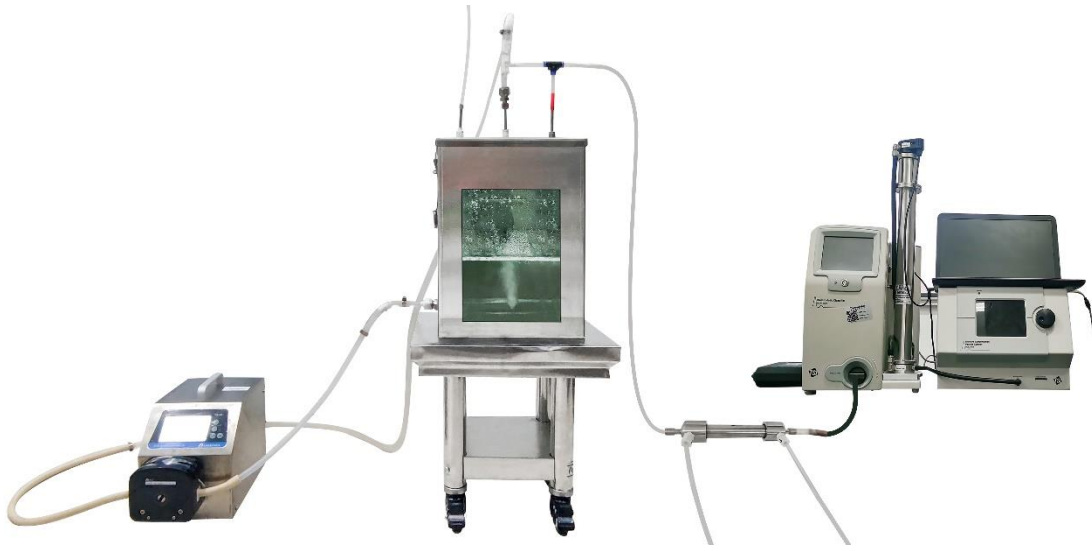

13

14 Figure S2. The physical drawing of a plunging jet-sea spray aerosol generator.

15

16

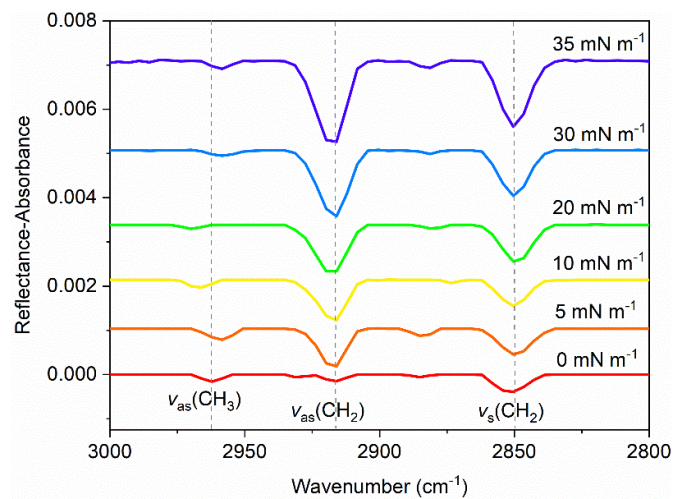

17

18 Figure S3. PM-IRRAS spectra (3000–2800 cm<sup>-1</sup>) of mixed fatty acids at the

19 air/seawater interface at different surface pressure.

20
